# Supplementary material for: Combined exome and whole-genome sequencing identifies mutations in ARMC4 as a cause of primary ciliary dyskinesia with defects in the outer dynein arm
Source: PubMed Central journal article supplement — J Med Genet. 2013 Nov 7;51(1):61–7. doi: 10.1136/jmedgenet-2013-101938 (PMC3888613; doi:10.1136/jmedgenet-2013-101938), 2013-11-07
Supplement: jmedgenet-2013-101938-s3.pdf [file jmedgenet-2013-101938-s3.pdf]

**Supplementary Table 1. Exome sequencing coverage and mapping in PCD-221 II:1**

|                                         |                    |
|-----------------------------------------|--------------------|
| Read length                             | 76 bp              |
| Total bases                             | 3 Gb               |
| Total reads                             | 40,375,630         |
| Reads mapped                            | 40,132,202 (99.3%) |
| % Target bases with coverage $\geq 4X$  | 93.1%              |
| % Target bases with coverage $\geq 10X$ | 84.9%              |
| % Target bases with coverage $\geq 20X$ | 68.3%              |
| Duplication rate                        | 5.91%              |
