# Supplementary material for: Combined exome and whole-genome sequencing identifies mutations in ARMC4 as a cause of primary ciliary dyskinesia with defects in the outer dynein arm
Source: PubMed Central journal article supplement — J Med Genet. 2013 Nov 7;51(1):61–7. doi: 10.1136/jmedgenet-2013-101938 (PMC3888613; doi:10.1136/jmedgenet-2013-101938), 2013-11-07
Supplement: jmedgenet-2013-101938-s6.pdf [file jmedgenet-2013-101938-s6.pdf]

**Supplementary Table 4. Sequential whole genome filtering analysis for samples PCD-141 I:1 and PCD-141 I:2**

| <b>Sample</b>                                                                                                        | <b>PCD-141 I:1</b>                                                                                                                                                                                                                                                    | <b>PCD-141 I:2</b> |
|----------------------------------------------------------------------------------------------------------------------|-----------------------------------------------------------------------------------------------------------------------------------------------------------------------------------------------------------------------------------------------------------------------|--------------------|
| All variants                                                                                                         | 9,186,019                                                                                                                                                                                                                                                             | 9,186,019          |
| Heterozygous variants                                                                                                | 2,791,707                                                                                                                                                                                                                                                             | 2,911,759          |
| Shared heterozygous nonsynonymous, splice-site, or insertion/deletion variants with MAF<0.01 in 1000 Genomes Project | 522                                                                                                                                                                                                                                                                   |                    |
| Of these, any in genes in Cilia Proteome                                                                             | 16 ( <i>RNF207</i> , <i>PPIAL4G</i> (two variants), <i>C3ORF67</i> , <i>TTC21A</i> , <i>ULK4</i> , <i>AGPAT9</i> , <i>ATXN1</i> , <i>PRSS1</i> , <i>PKHD1L1</i> , <i>PDLIM2</i> , <i>C10ORF122</i> , <i>ARMC4</i> , <i>GOLGA3</i> , <i>C12ORF55</i> , <i>MYO15A</i> ) |                    |
| Of these, any in genes implicated in cilia motility*                                                                 | 1 ( <i>ARMC4</i> )                                                                                                                                                                                                                                                    |                    |

\* Identified in KM Lonergan *et al* (2006). Identification of novel lung genes in bronchial epithelium by serial analysis of gene expression. *Am J Respir Cell Mol Biol* 35 (6):651-661; and ET O'Toole *et al* (2012). Computer-assisted image analysis of human cilia and *Chlamydomonas* flagella reveals both similarities and differences in axoneme structure. *Cytoskeleton (Hoboken )* 69 (8):577-590.
